# Supplementary material for: Identification of MADS-Box Transcription Factors in Iris laevigata and Functional Assessment of IlSEP3 and IlSVP during Flowering
Source: MDPI journal article supplement (doi:10.3390/ijms23179950), 2022-09-01

# **Supplemental Figures**

Supplemental Figure S1.

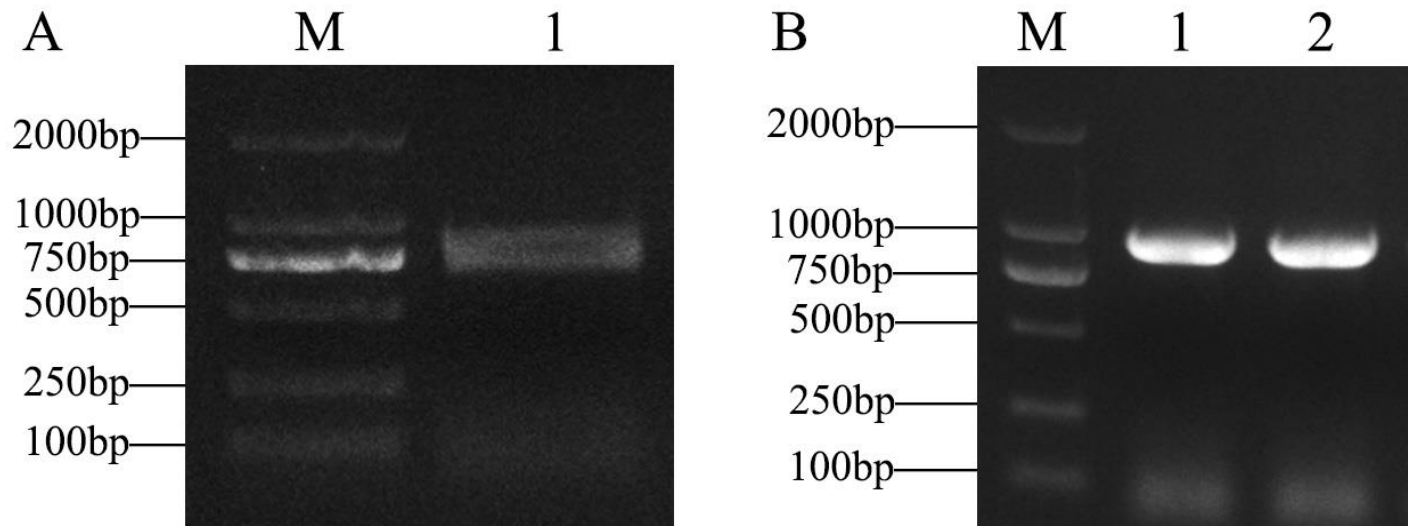

Supplemental Figure S2.

|   |     |                                                                                            |
|---|-----|--------------------------------------------------------------------------------------------|
| A | 1   | ATGGTGAGGGGAGAGTGGAGCTGAAGAGGATTGAGAACAGATCAACCGGCAGGTGACATTGCGCAAGAGGAGGAATGGGCTGCTCAAG   |
|   | 1   | M V R G R V E L K R I E N K I N R Q V T F A K R R N G L L K                                |
|   | 91  | AAGGCCTACGAGCTGTCTGTGCTCTGCGACGCCGAGGTGCGTCTCATCATCTTCTCCAACCGAGGGAAGCTCTATGAGTTCTGCAGCAGC |
|   | 31  | K A Y E L S V L C D A E V A L I I F S N R G K L Y E F C S S                                |
|   | 181 | TCCAGCATGTTGAAAACTGGATAGGTATCAAAAAAGCAGTTATGGGCAACCTGATACCAGTGTACAAATAAGGGAGAATCAGTTGCTG   |
|   | 61  | S S M L K T L D R Y Q K S S Y G Q P D T S V Q I R E N Q L L                                |
|   | 271 | CAGAGTAGTCATCAAGAATACTTGAAACTCAAAGCGCGTGTGGAAGCTTTACAACGATCACAAAGGAATCTTCTTGGTGAGGATCTTGGG |
|   | 91  | Q S S H Q E Y L K L K A R V E A L Q R S Q R N L L G E D L G                                |
|   | 361 | CCTCTAAGCAGCAAGGAGCTGGAGCAACTCGAAAGACAAGTAGACGCATCGTTAAAGCAAATAAGATCAACAAGGACACAGTATATGCTC |
|   | 121 | P L S S K E L E Q L E R Q L D A S L K Q I R S T R T Q Y M L                                |
|   | 451 | GACCAGCTTGCTGACCTTCAAAGAAAGGAACAGATGCTCTGTGAAGCTAACAGAAGTCTCAGGAAGAGGTGGAAGAAAGTAACCAGGCT  |
|   | 151 | D Q L A D L Q R K E Q M L C E A N R S L R K R L E E S N Q A                                |
|   | 541 | GACCAGCAGGTCTGGGAGTCCAATGCTAATGCAATAGCATAAGTCGGCAAGCAAATCAACAAGGAGAAGAATTCTACCACTCTTA      |
|   | 181 | D Q Q V W E S N A N A I A Y S R Q A N Q Q Q G E E F Y H P L                                |
|   | 631 | GATTGCCAGCCACTCTACAGATTGGGTTCCAACCTGATCAAAATGCCTGGTCCGAGTGTGACTGGTTATGTGCAGGGATGGCTTCCGTGA |
|   | 211 | D C Q P T L Q I G F Q P D Q M P G P S V T G Y V Q G W L P *                                |
| B | 1   | ATGGCGAGGGAGAAGATACAGGTGCGGAAGATTGACAACGCGACGGCGAGGCAGGTGACCTTCTCGAAGAGGAGGAGGGGCTGTTCAAG  |
|   | 1   | M A R E K I Q V R K I D N A T A R Q V T F S K R R R G L F K                                |
|   | 91  | AAGGCCGAGGAGCTCTCCGTCCTCTGCGACGCCGAGGTGCGGCTCATCATCTTCTCCGCCACCGGCAAGCTCTTCGAGTTCCGCGATTCC |
|   | 31  | K A E E L S V L C D A E V G L I I F S A T G K L F E F A S S                                |
|   | 181 | AGTATGAAAGATATCATTGAAAAGCGCAGCATGCATTCAAAGGACATATTGCAGGACAAACCATCACTGGACTTGAATTTAGAGAATTGT |
|   | 61  | S M K D I I E K R S M H S K D I L Q D K P S L D L N L E N C                                |
|   | 271 | AAITATTCAAGTCTGACAAAAACAGTCGCGAGGCAACTCAACAATAAGAAAGACGAAGGGTGAAGACCTTAAAGGCTTATCGATAGAG   |
|   | 91  | N Y S S L T K T V A E A T Q Q L R K T K G E D L K G L S I E                                |
|   | 361 | GAGCTTCAACAGCTAGAGAAAACTCTTCAAAGTGGGTTAGATCGAGTTCTAGAGAAAAAGGTGAGCAGATTATGAAAAGGATCAGTGCT  |
|   | 121 | E L Q Q L E K T L Q T G L D R V L E K K G E Q I M K R I S A                                |
|   | 451 | CTTGAAAAATAAGGACTCCAATTAATGGAAGAGAATACAGACTGAGACAACAAATGGAGCTCGATATGTCGACAGTGGGGAAGCAGGTT  |
|   | 151 | L E N K G L Q L M E E N T R L R Q Q M E L D M S T V G K Q V                                |
|   | 541 | GTTACCGGCTCTGAAAATGGAATTATATGAAGATGGACAGTCCTCAGAATCAGTCACCAACGCTTACATTCTGGGGGGCCGCTCAAGAT  |
|   | 181 | V T G S E N G L Y E D G Q S S E S V T N A S H S G G P P Q D                                |
|   | 631 | TATGATGACAGTTTTGACACCTCTCTCAAGTTAGGGCTTCCGTGGAAGGAATCGAAGGGCACGATGATGCAGTAG                |
|   | 211 | Y D D S F D T S L K L G L P W K E S K G T M M Q *                                          |

Supplemental Figure S3.

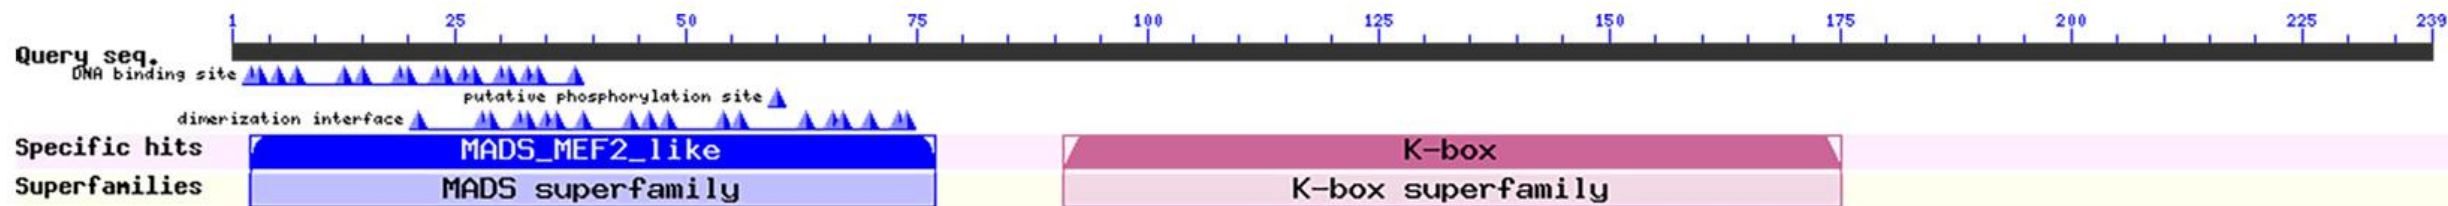

A

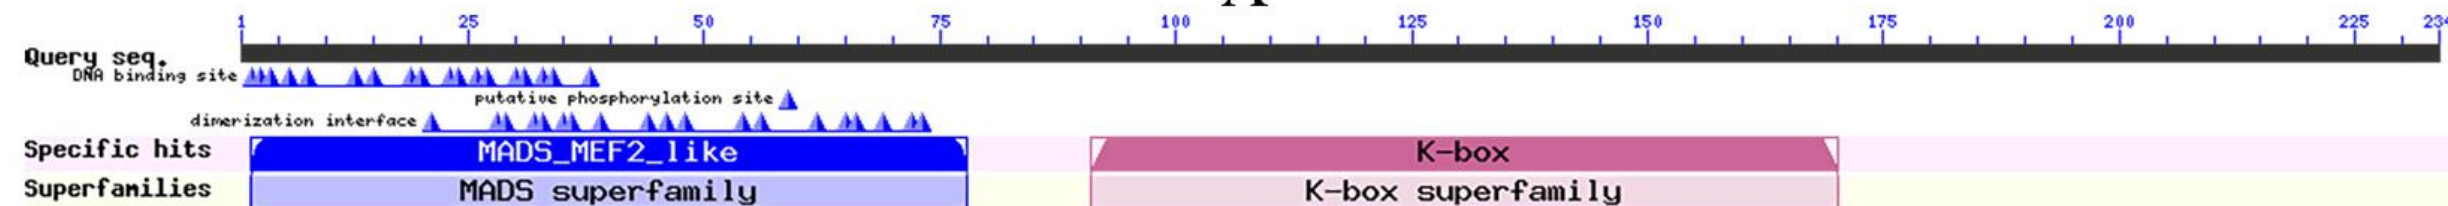

B

**Supplemental Figure S4. A**

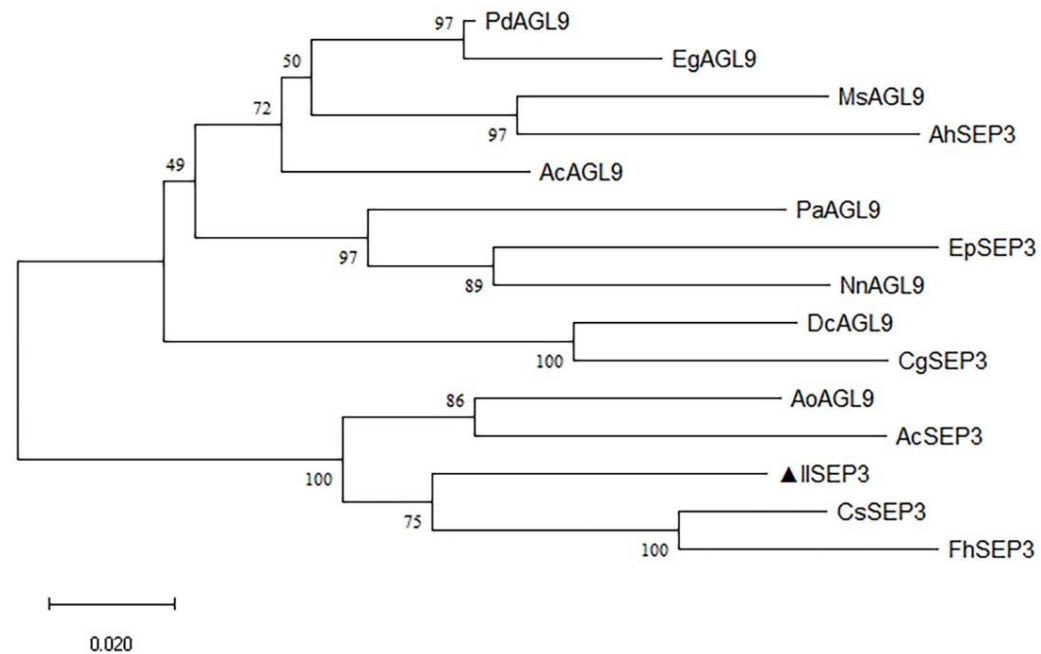

**B**

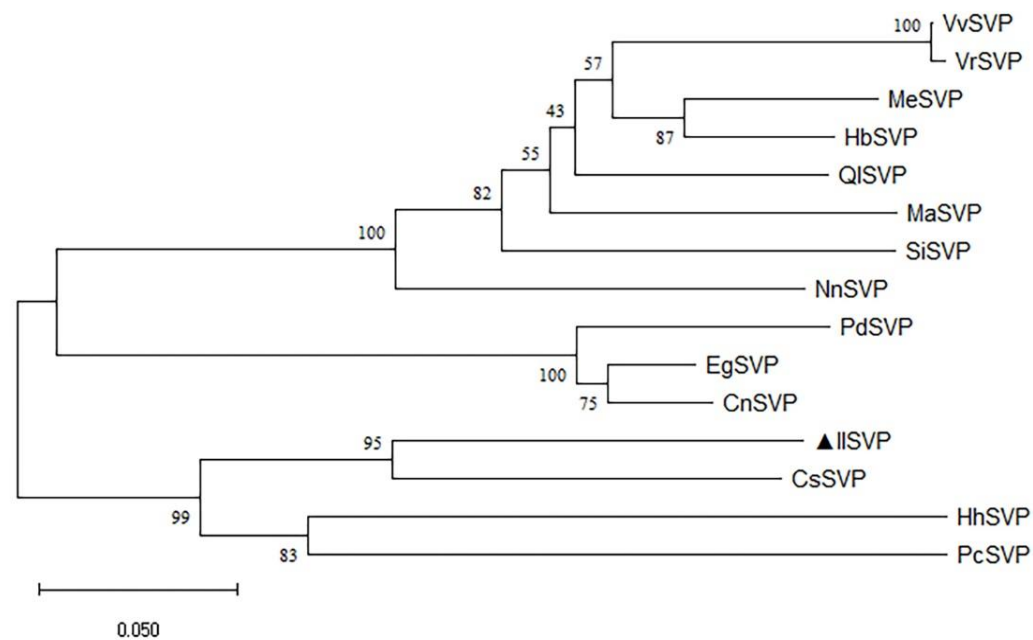

Supplemental Figure S5

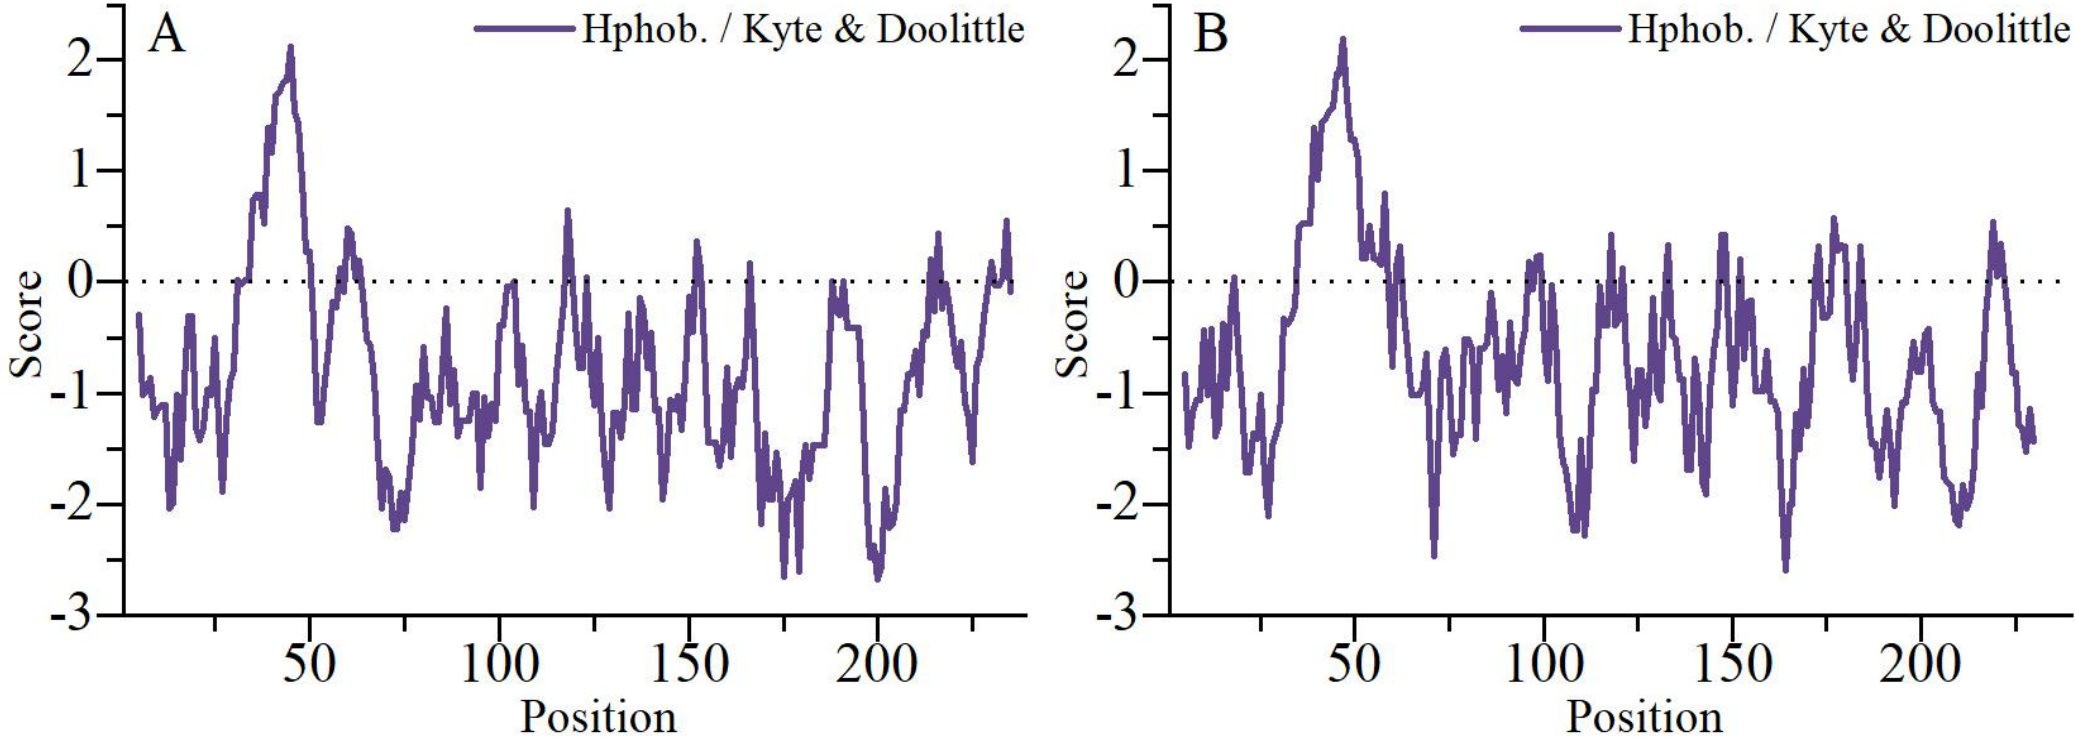

Supplemental Figure S6

A

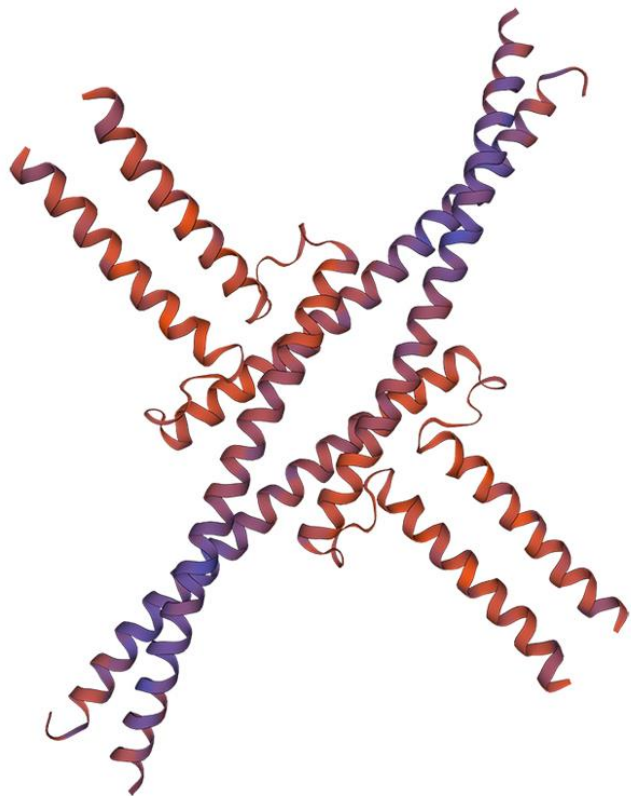

B

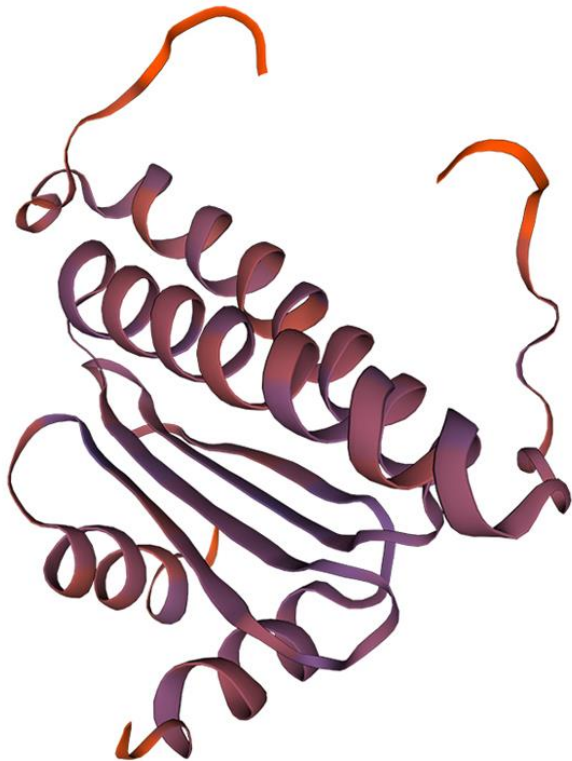

Supplemental Figure S7

A NetPhos 3.1a: predicted phosphorylation sites in IlSEP3

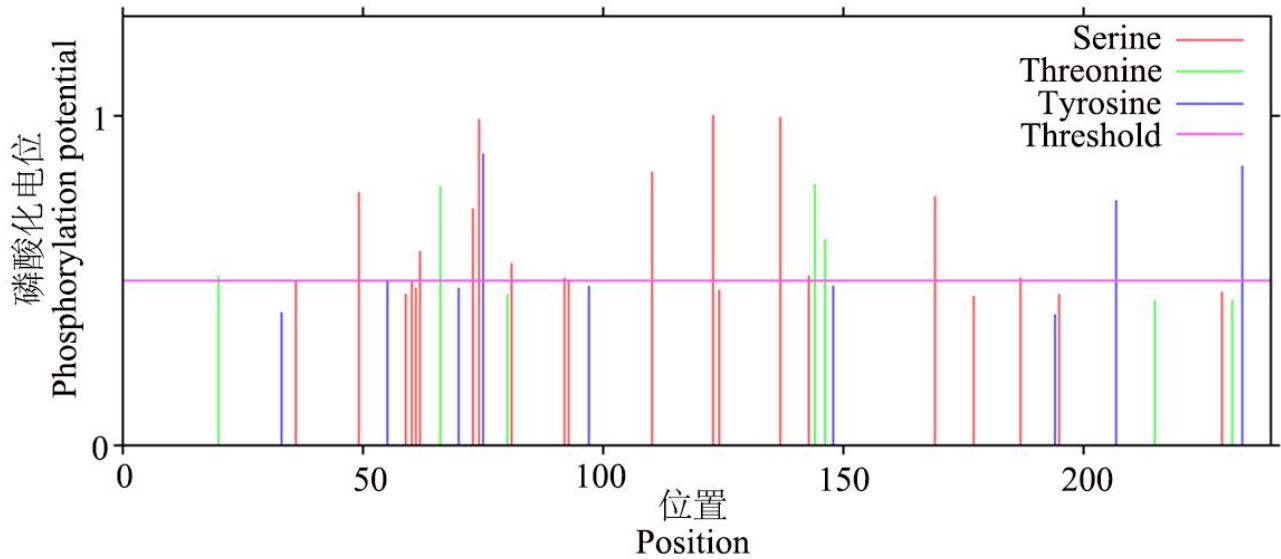

B NetPhos 3.1a: predicted phosphorylation sites in IlSVP

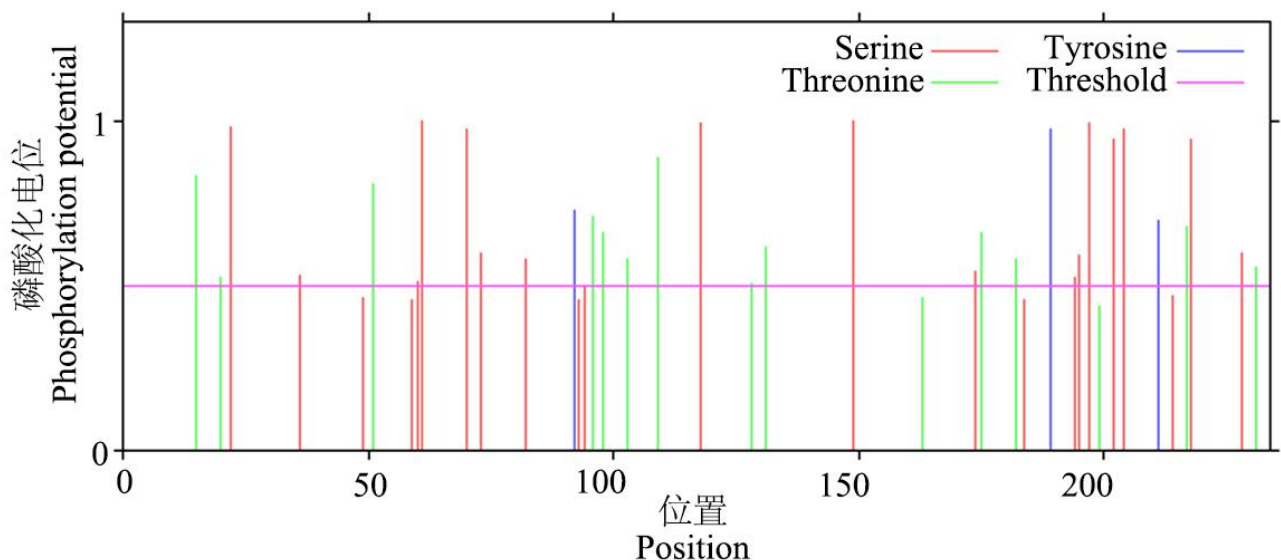



Supplemental Figure S8

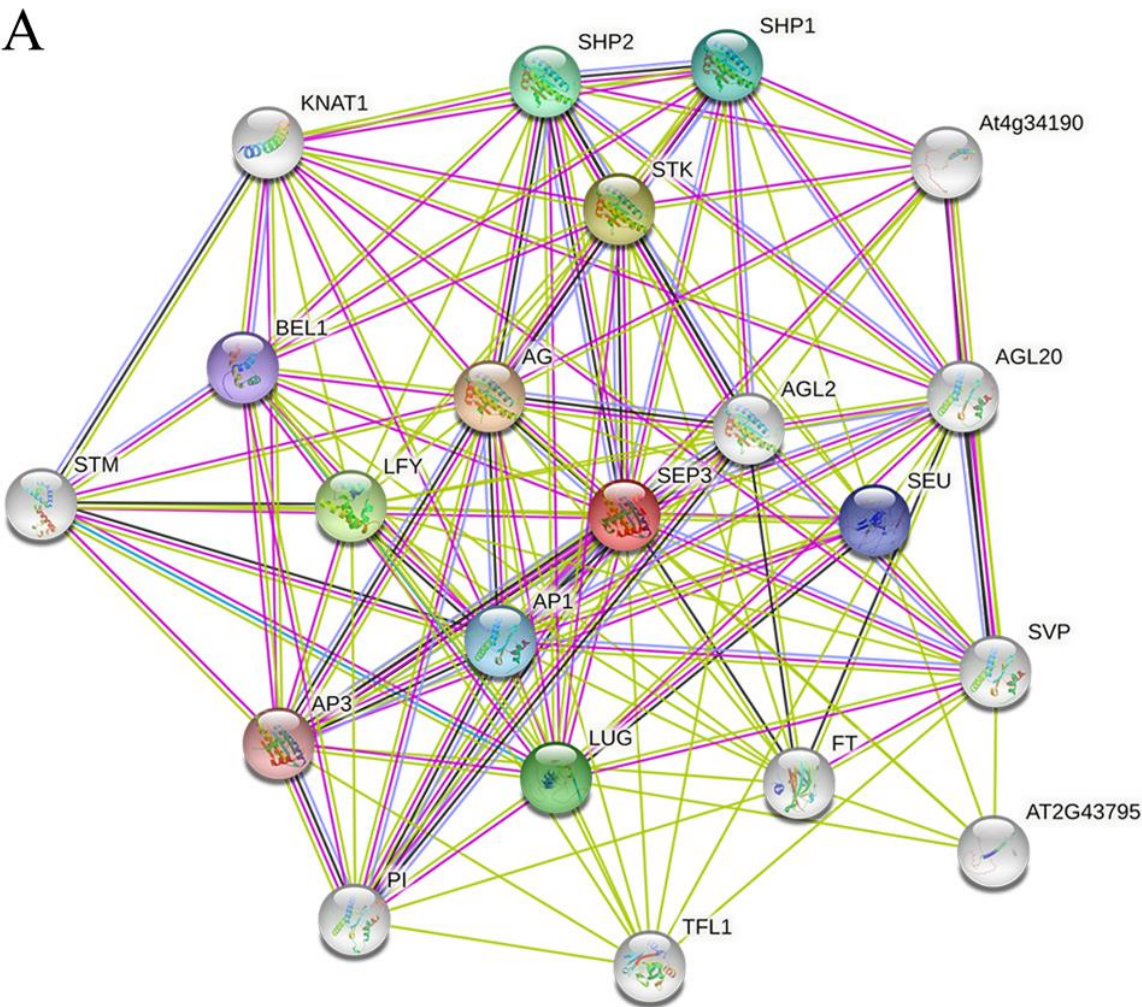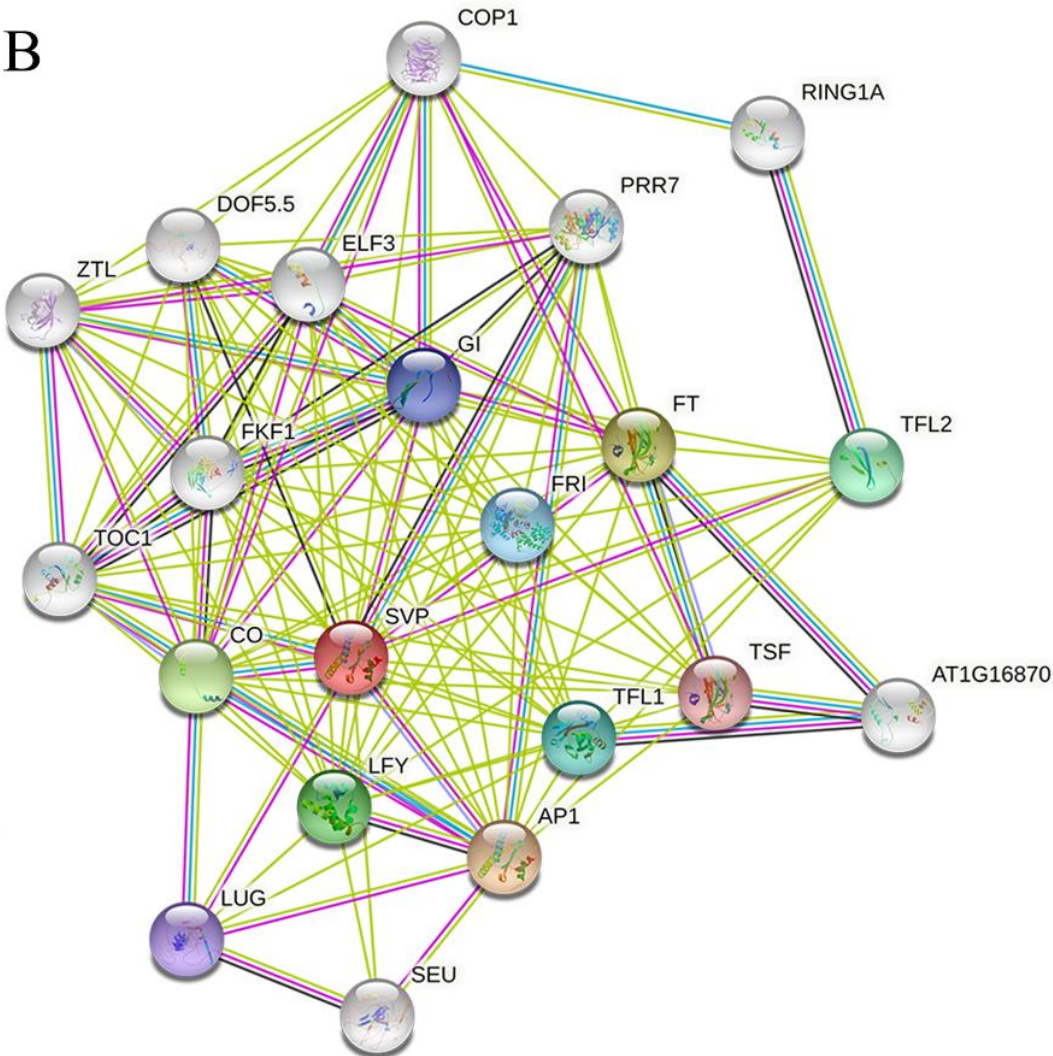

Supplemental Figure S9

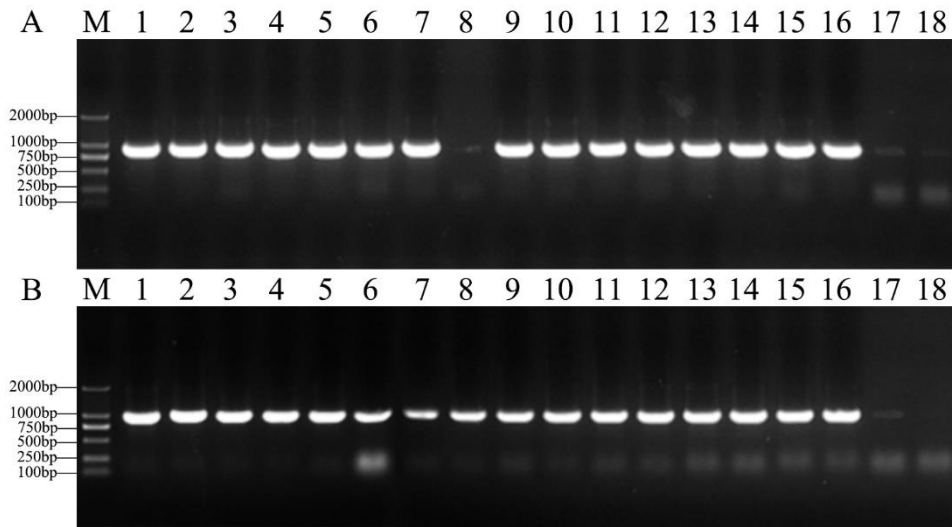

Supplement: s1 [file s1]
