# Supplementary material for: Identification of MADS-Box Transcription Factors in Iris laevigata and Functional Assessment of IlSEP3 and IlSVP during Flowering
Source: MDPI journal article supplement (doi:10.3390/ijms23179950), 2022-09-01
Supplement: s1 [file s1]

**Table S1.** Predicted physicochemical properties of *I/SEP3* and *I/SVP*

|                        | <i>I/SEP3</i>                                                                                                                                                                                                                                                         | <i>I/SVP</i>                                                                                                                                                                                                                                                         |
|------------------------|-----------------------------------------------------------------------------------------------------------------------------------------------------------------------------------------------------------------------------------------------------------------------|----------------------------------------------------------------------------------------------------------------------------------------------------------------------------------------------------------------------------------------------------------------------|
| ORF (bp)               | 720                                                                                                                                                                                                                                                                   | 705                                                                                                                                                                                                                                                                  |
| Amino acid Residues    | 239                                                                                                                                                                                                                                                                   | 234                                                                                                                                                                                                                                                                  |
| MW (kDa)               | 27.64                                                                                                                                                                                                                                                                 | 26.26                                                                                                                                                                                                                                                                |
| pI                     | 8.99                                                                                                                                                                                                                                                                  | 6.24                                                                                                                                                                                                                                                                 |
| Amino Acid composition | Ala (A) 5.9%、Arg (R) 8.4%、Asn (N) 4.6%、Asp (D) 4.2%、Cys (C) 1.7%、Gln (Q) 11.7%、Glu (E) 7.9%、Gly (G) 4.6%、His (H) 0.8%、Ile (I) 3.3%、Leu (L) 13.0%、Lys (K) 5.9%、Met (M) 2.1%、Phe (F) 2.1%、Pro (P) 3.3%、Ser (S) 8.8%、Thr (T) 2.9%、Trp (W) 0.8%、Tyr (Y) 3.8%、Val (V) 4.2% | Ala (A) 4.7%、Arg (R) 5.1%、Asn (N) 3.4%、Asp (D) 6.0%、Cys (C) 0.9%、Gln (Q) 6.8%、Glu (E) 9.4%、Gly (G) 6.8%、His (H) 0.9%、Ile (I) 4.3%、Leu (L) 11.5%、Lys (K) 9.8%、Met (M) 3.8%、Phe (F) 2.6%、Pro (P) 1.7%、Ser (S) 9.8%、Thr (T) 6.4%、Trp (W) 0.4%、Tyr (Y) 1.3%、Val (V) 4.3% |
|                        |                                                                                                                                                                                                                                                                       |                                                                                                                                                                                                                                                                      |
|                        |                                                                                                                                                                                                                                                                       |                                                                                                                                                                                                                                                                      |
|                        |                                                                                                                                                                                                                                                                       |                                                                                                                                                                                                                                                                      |
|                        |                                                                                                                                                                                                                                                                       |                                                                                                                                                                                                                                                                      |
|                        |                                                                                                                                                                                                                                                                       |                                                                                                                                                                                                                                                                      |
|                        |                                                                                                                                                                                                                                                                       |                                                                                                                                                                                                                                                                      |
|                        |                                                                                                                                                                                                                                                                       |                                                                                                                                                                                                                                                                      |
| Instability index      | 52.53                                                                                                                                                                                                                                                                 | 52.76                                                                                                                                                                                                                                                                |
| Aliphatic index        | 81.63                                                                                                                                                                                                                                                                 | 78.76                                                                                                                                                                                                                                                                |
| GRAVY                  | -0.782                                                                                                                                                                                                                                                                | -0.676                                                                                                                                                                                                                                                               |

ORF: open reading frame; MW: molecular weight; GRAVY: Grand average of hydropathicity.
